# Supplementary material
Source: publisher figshare collection journal article supplement (https://frontiersin.figshare.com/ndownloader/files/25682915)
Supplement: Supplementary file [file 25682915]

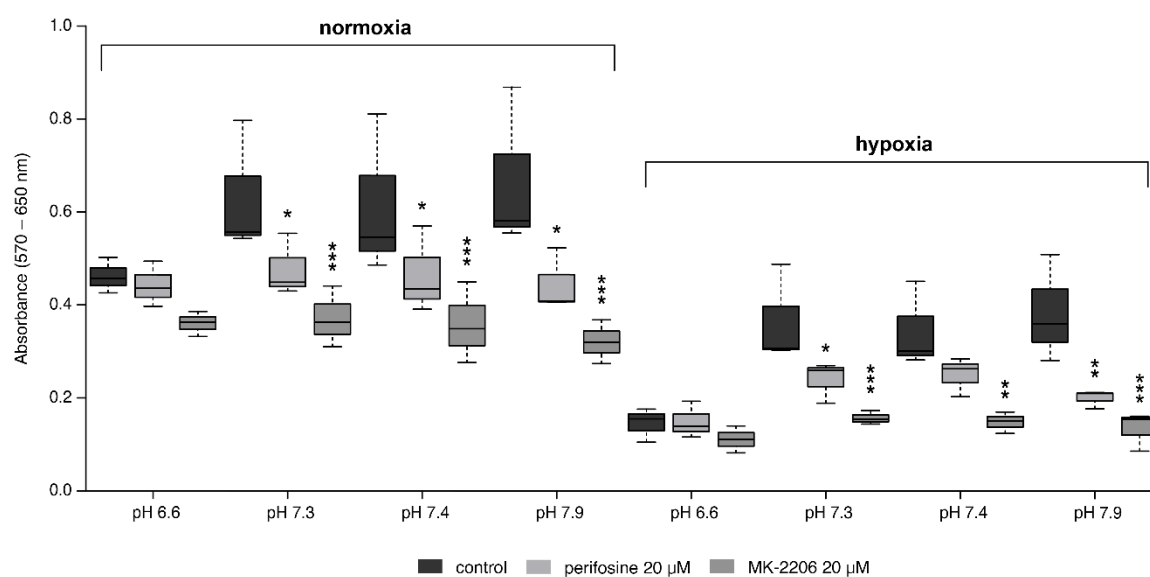

**Supplementary Figure 10: pH-dependent efficacy of MK-2206.** Monolayers of HT-29 cells were exposed to the different pH conditions in normoxia and hypoxia. After 72 h, the cells were induced with 20 μM MK-2206 or with perifosine for 24 h and the viability was assessed by MTT test. Results are presented in boxplots showing median, interquartile range, minimum and maximum values; significant difference (\*) between controls and perifosine- or MK-2206-induced samples was evaluated by t-test, \*  $p < 0.05$ , \*\*  $p < 0.01$ , \*\*\*  $p < 0.001$ .
